# Supplementary material
Source: publisher figshare collection journal article supplement (https://acs.figshare.com/ndownloader/files/7395607)
Supplement: Supplementary file 1 [file 7395607]

# **One-dimensional Coordination Polymers of Bis-(3-pyridyl-acrylamido)ethane: Influence of Anions and Metal Ions on Their Solid State [2+2] Photochemical Polymerization and Dimerization Reactions**

Mousumi Garai and Kumar Biradha\*

Department of Chemistry, Indian Institute of Technology, Kharagpur-721302, India

Fax: 91-3222-282252; Tel: 91-3222-283346 E-mail: [kbiradha@chem.iitkgp.ernet.in](mailto:kbiradha@chem.iitkgp.ernet.in)

## **Table of Contents**

|                                                                  |      |
|------------------------------------------------------------------|------|
| <sup>1</sup> H NMR spectra                                       | 2    |
| FTIR spectra                                                     | 3-4  |
| PXRD patterns                                                    | 4-6  |
| MALDI-TOF mass spectra                                           | 6    |
| Crystal structure analysis                                       | 7-8  |
| Bond lengths around M(II) centers                                | 8    |
| Elemental analysis of irradiated complexes <b>2</b> and <b>3</b> | 9    |
| TGA analysis                                                     | 9-10 |

## <sup>1</sup>H NMR Spectra

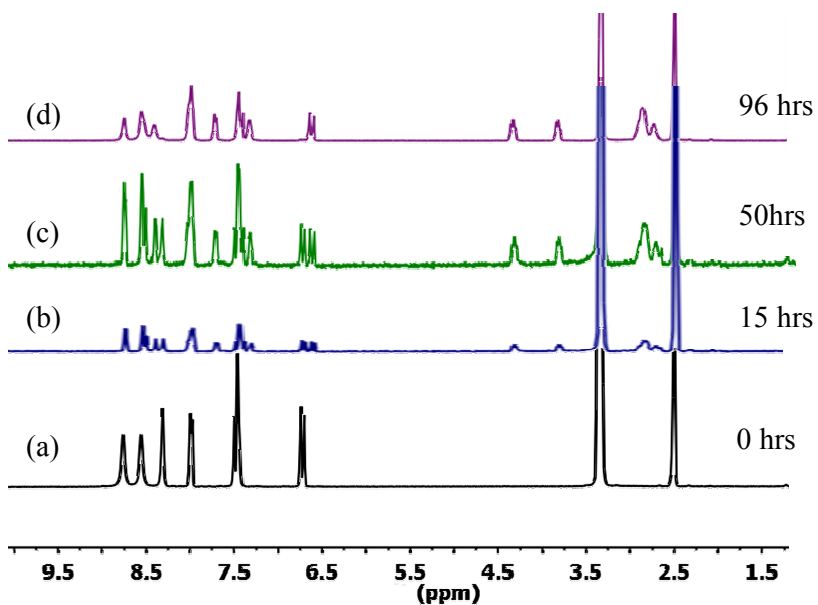

**Figure S1.** <sup>1</sup>H-NMR spectra recorded at various stages of irradiation of complex 1 after separation (a) before irradiation, (b-c) intermediate stages of irradiation and (d) after full irradiation (400MHz, D<sup>6</sup> DMSO).

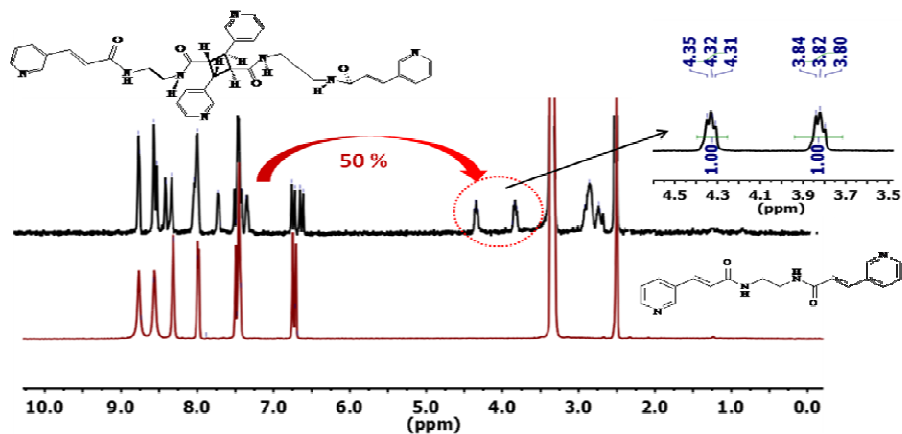

**Figure S2.** <sup>1</sup>H NMR spectra of irradiated complex 4 after separation in 50% conversion (400MHz, D<sup>6</sup> DMSO).

## FTIR Spectra

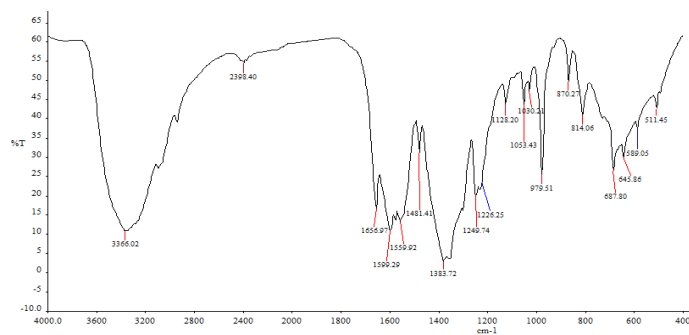

Figure S3. FTIR spectra of 1.

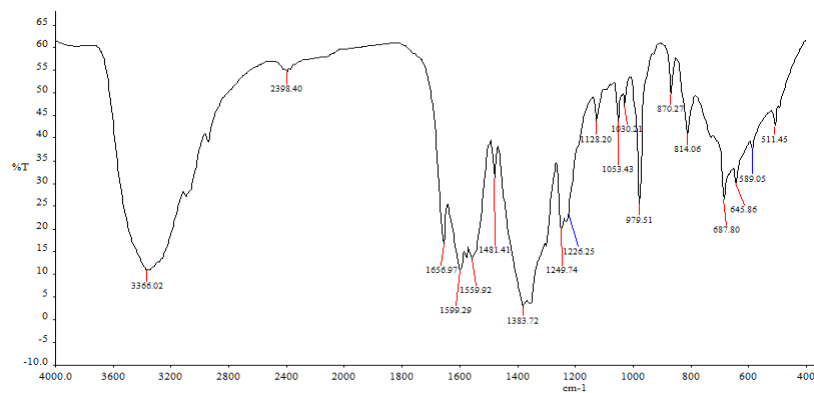

Figure S4. FTIR spectra of 2.

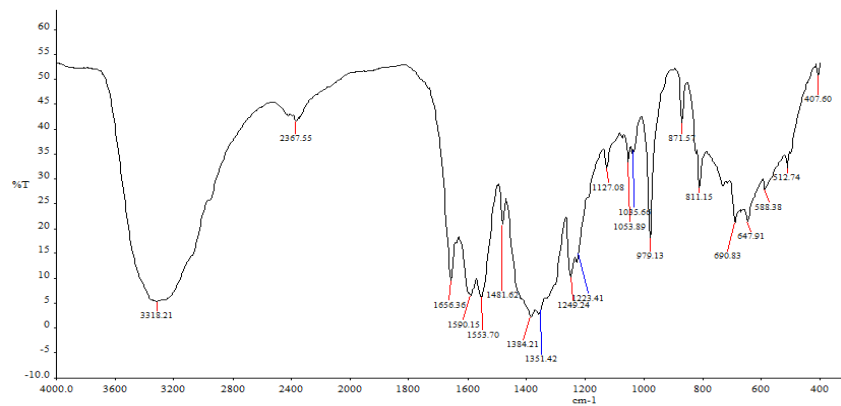

Figure S5. FTIR spectra of 3.

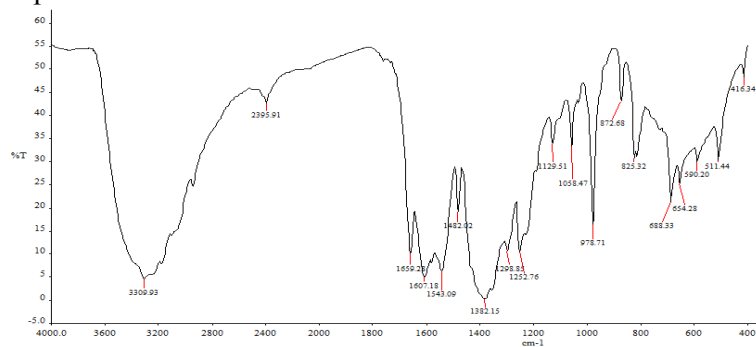

Figure S6. FTIR spectra of 4.

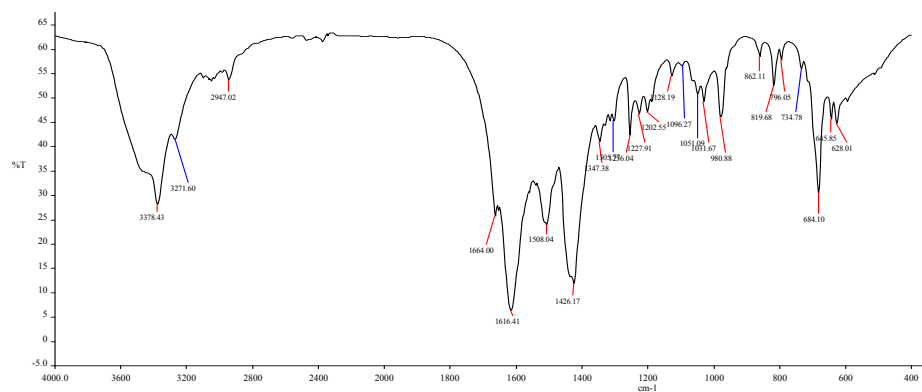

**Figure S7.** FTIR spectra of **5**.

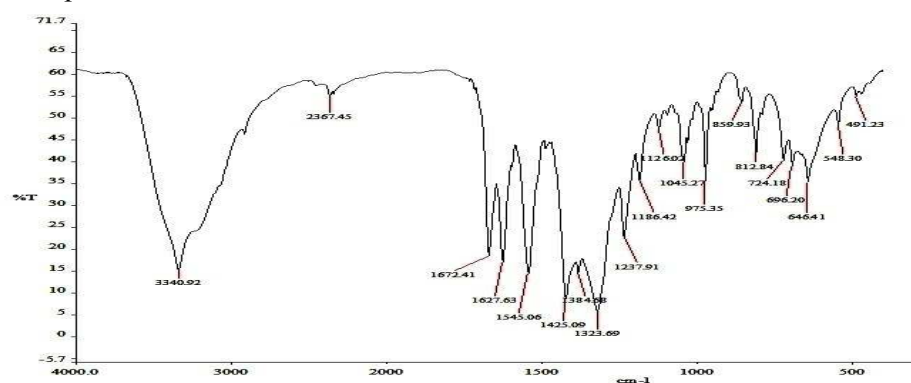

**Figure S8.** FTIR spectra of **6**.

### XRPD pattern

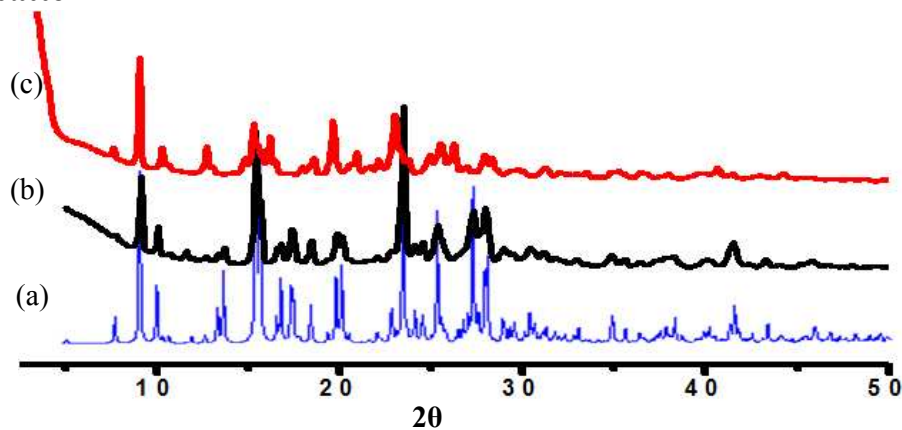

**Figure S9.** XRPD patterns of complex **1** before irradiation (a) calculated, (b) observed and after irradiation (c) observed.

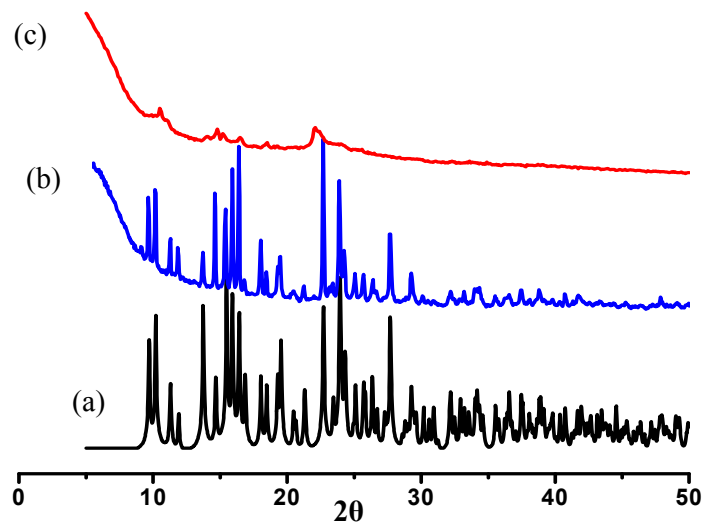

**Figure S10.** XRPD patterns of complex **2** (a) calculated, (b) observed and after irradiation (c) observed.

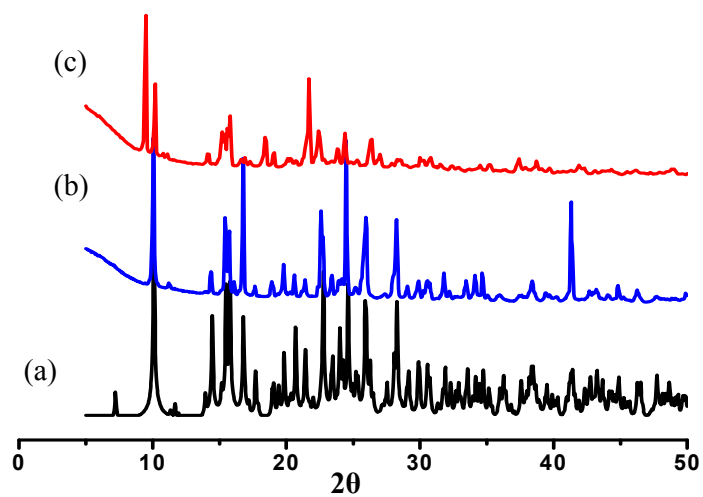

**Figure S11.** XRPD patterns of complex **3** (a) calculated, (b) observed and after irradiation (c) observed.

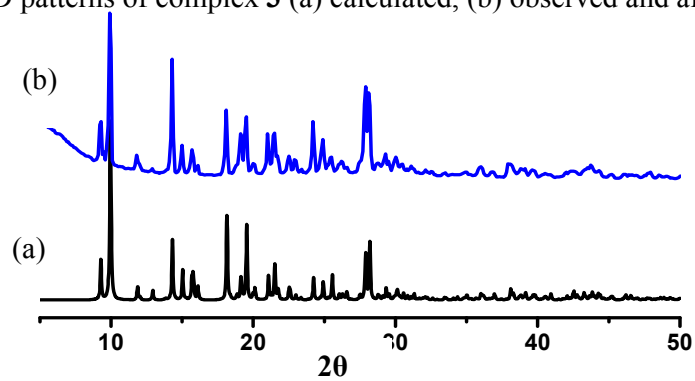

**Figure S12.** XRPD patterns of complex **4** (a) calculated, (b) observed.

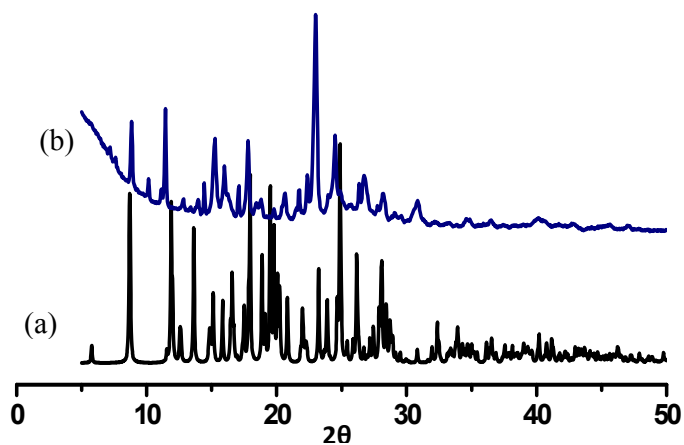

**Figure S13.** XRPD patterns of complex **5** (a) calculated, (b) observed.

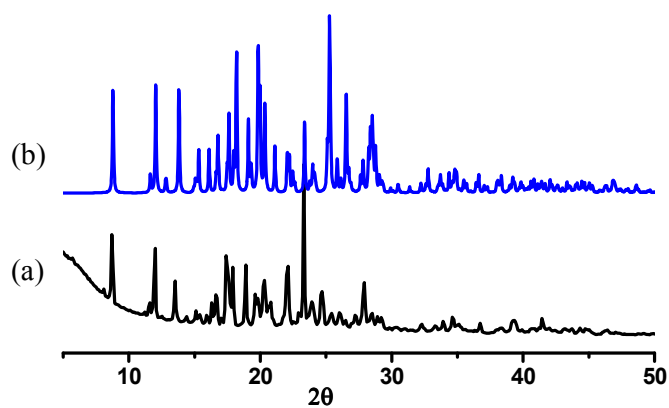

**Figure S14.** XRPD patterns of complex **6** (a) calculated, (b) observed.

## MALDI-TOF mass spectra

### Sample preparation for MALDI-TOF analysis:

2 mg irradiated materials were homogenously dispersed in 1 ml of ethanol and added 2, 5 di-hydroxy benzoic acid (DHB) as a matrix. Then, prepared sample was drop casted on the plate and dried in room temperature.

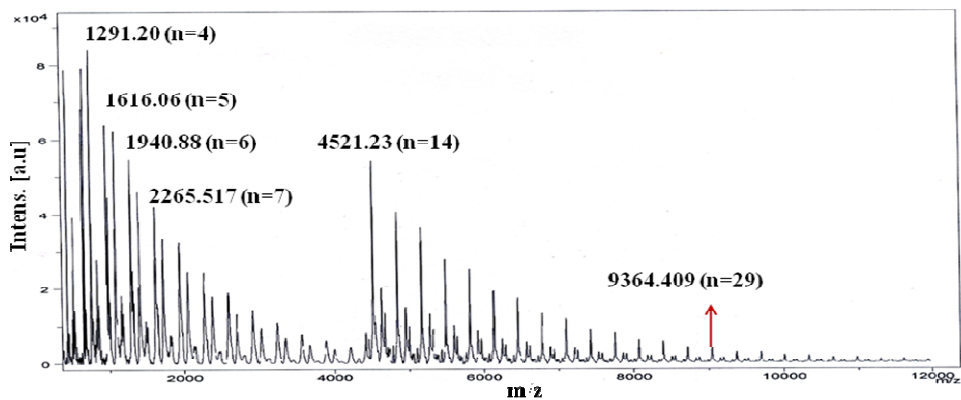

**Figure S15.** MALDI-TOF mass spectra of irradiated complex **2**.

## Crystal structure analysis

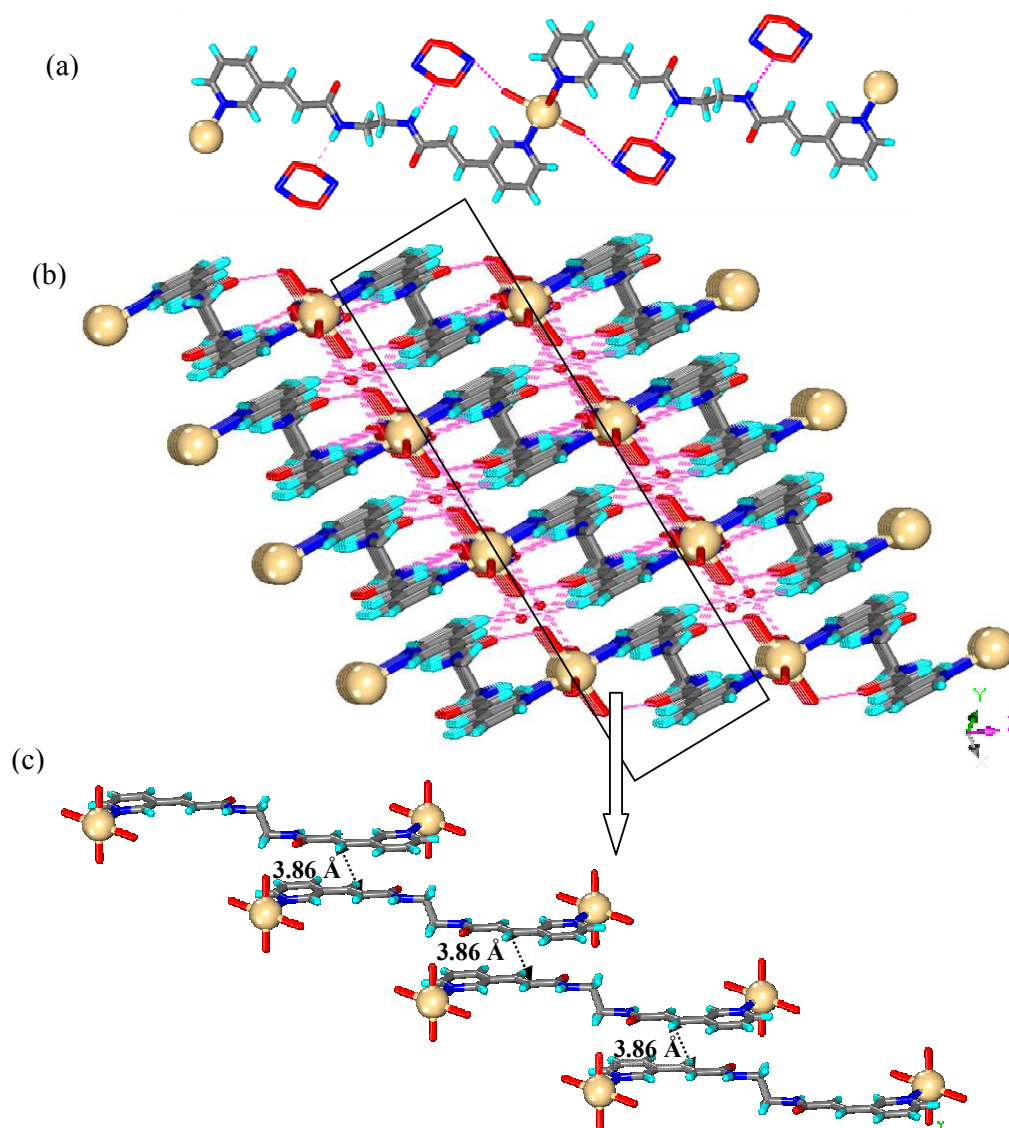

**Figure S16.** Illustrations for the crystal structure of **2**: (a) one-dimensional CPs, notice the hydrogen bonded nitrate ion with coordinated water and amide N-H groups; (b) packing of the 1D-chains in the lattice via hydrogen bonding between amides, water and nitrate ions; (c) alignment of 1D-chains for polymerization reaction.

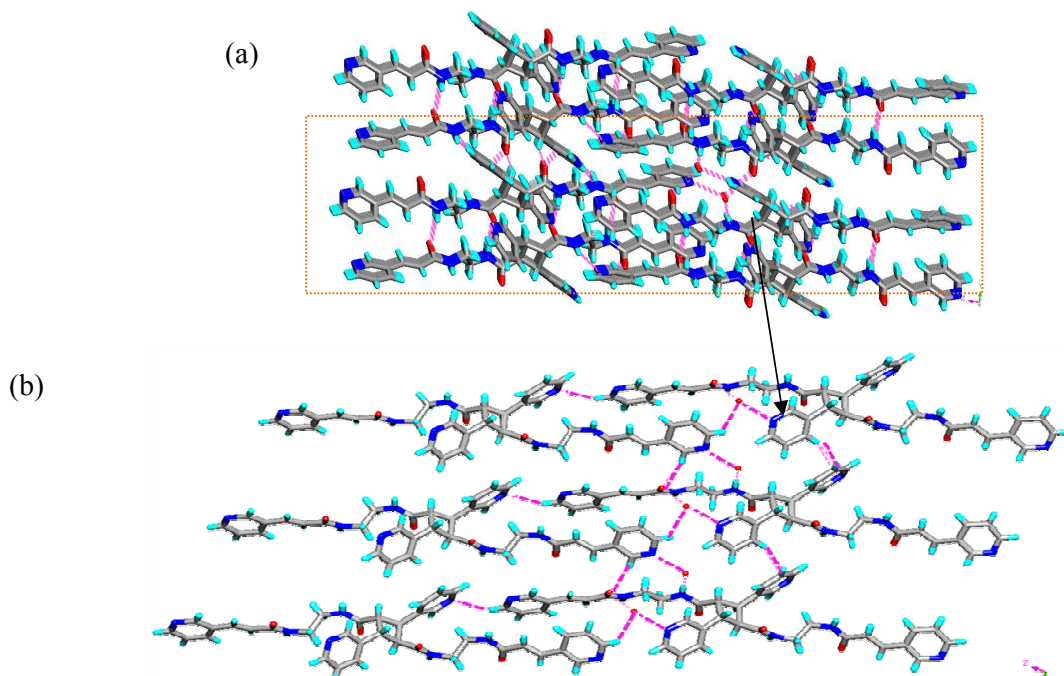

**Figure S17.** Illustrations for the crystal structure of **7**: (a) packing of the dimers in the lattice via hydrogen bonding between amides and waters; (b) two-dimensional hydrogen bonded layer of dimers.

**Table S1. Bond lengths around M(II) centers**

| CPs      | M-N (Å)             | M-O (Å)                                    |
|----------|---------------------|--------------------------------------------|
| <b>1</b> | 2.007, 2.012, 2.015 | 1.978, 2.007, 2.015,<br>2.295 2.490, 2.584 |
| <b>2</b> | 2.306(7)            | 2.267(16), 2.326(13)                       |
| <b>3</b> | 2.150(3), 2.204(3)  | 2.074(2), 2.078(2),<br>2.109(2), 2.140(3)  |
| <b>4</b> | 2.026(4), 2.036(4)  | 1.929(4), 1.954(4),<br>2.353(4)            |
| <b>5</b> | 2.322(2)            | 2.267(2), 2.322(2)                         |
| <b>6</b> | 2.159(3)            | 2.097(3), 2.148(3)                         |



## Elemental analysis of irradiated complexes **2** and **3**

Irradiated **2**,  $\{[\text{Cd}(\text{L})(\text{H}_2\text{O})_4] \cdot 2(\text{NO}_3)\}_n$  Anal. Calc.(%) for  $\text{C}_{18}\text{H}_{26}\text{CdN}_6\text{O}_{12}$  (630.84): calc. (%) C, 34.27; H, 4.15; N, 13.32; found (%) C, 35.39; H, 4.86; N, 13.47.

Irradiated **3**,  $\{[\text{Zn}(\text{L})(\text{H}_2\text{O})_4] \cdot 2(\text{NO}_3) \cdot 2(\text{H}_2\text{O})\}_n$  Anal. Calc.(%) for  $\text{C}_{18}\text{H}_{30}\text{CdN}_6\text{O}_{14}$  (619.85) calc.(%) C, 34.88; H, 4.88; N, 13.56; found (%) C, 34.83; H, 4.68; N, 13.27.

## TGA analysis

The thermal analyses of CPs (**1-6**) were performed in  $\text{N}_2$  atmosphere to investigate their thermal stability. The CPs **1**, **2** and **3** exhibits similar type of thermal decomposition. For all three complexes, initially 13-14% weight loss occurred range of 89-100 °C due to loss of coordinated and free water molecules. The complex **1** found to have fast decomposition in the temperature range of 200-245 °C, complex **2** slowly decomposes from 248 °C onwards and complex **3** also slowly decomposes 207 °C onwards (Fig. S18). The complex **4** exhibits 7% weight loss 77 °C that corresponds to the loss of water molecules and 25% weight loss occurred gradually in between 220-300 °C corresponding to acetate ions. From 310 °C onwards the gradual degradation started and continued up to 530 °C (Fig. S19). The complexes **5** and **6** show three steps degradations. Initial 9% weight loss occurs (77 °C to 122 °C) due to four coordinated and one free water molecules. Second loss occurs at 166-186°C and 126-143 °C for **5** and **6**, respectively, corresponding to the loss of perchlorate ions. The final degradation of the complexes **5** and **6** started at temperatures 320 °C and 324 °C respectively (Fig. S20).

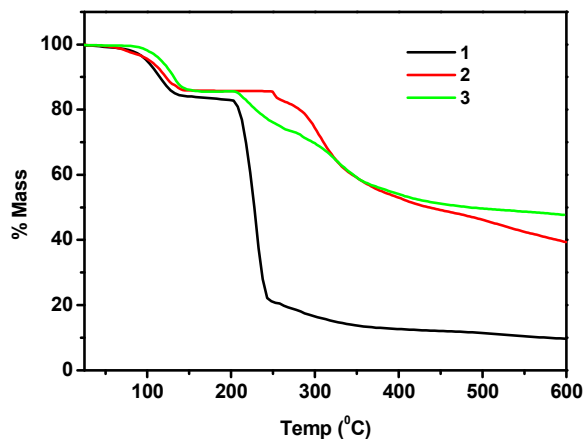

**Figure S18.** Thermal gravimetric analysis for **1**, **2** and **3**.

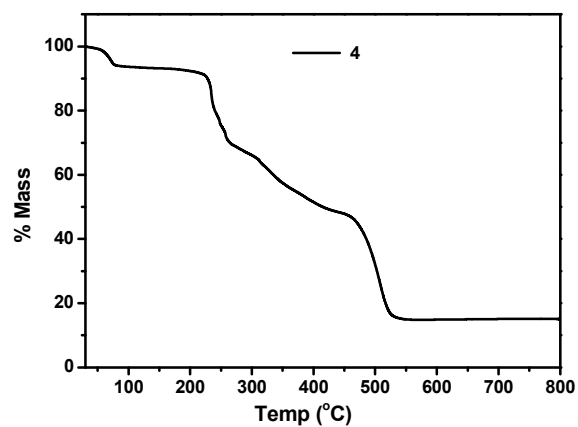

**Figure S19.** Thermal gravimetric analysis for **4**.

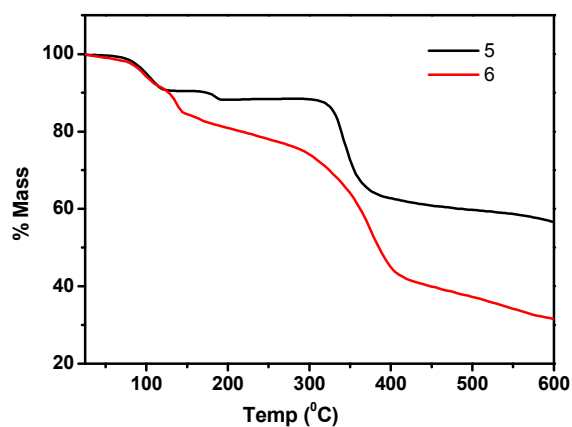

**Figure S20.** Thermal gravimetric analysis for **5** and **6**.

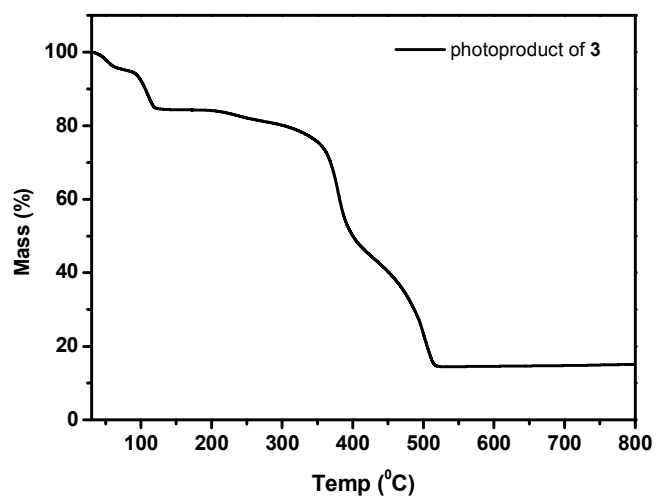

**Figure S21.** Thermal gravimetric analysis for irradiated materials of **3**.
